# Supplementary material
Source: Preprints.org preprint supplement (doi:10.20944/preprints202007.0469.v3)
Supplement: Supplementary file 1 [file supplementary]

# A Contextual Foundation for Mechanics, Thermodynamics, and Evolution

## Table of Contents

|     |                                                       |    |
|-----|-------------------------------------------------------|----|
| 1.  | Introduction.....                                     | 1  |
| 1.1 | The Problems of Time .....                            | 1  |
| 1.2 | The Problem of Contextuality.....                     | 3  |
| 1.3 | The Problem of Measurement.....                       | 3  |
| 1.4 | The Problem of Nonlocality.....                       | 4  |
| 1.5 | We Need a Better Conceptual Model.....                | 4  |
| 2.  | The Dissipative Conceptual Model of State .....       | 5  |
| 2.1 | The Postulates of State.....                          | 5  |
| 2.2 | The Dissipative Classical State .....                 | 9  |
| 2.3 | The Dissipative Quantum State.....                    | 9  |
| 2.4 | The Quantization and Refinement of Space .....        | 10 |
| 2.5 | Entropy, Wavefunction Collapse, and Measurement ..... | 12 |
| 3.  | The Dissipative Conceptual Model of Time.....         | 13 |
| 3.1 | The Two Components of System Time .....               | 13 |
| 3.2 | Reference Time .....                                  | 14 |
| 3.3 | Space, Time, and Nonlocality .....                    | 13 |
| 4.  | The Dissipative Conceptual Model of Process .....     | 16 |
| 4.1 | The Dissipative Homeostate .....                      | 16 |
| 4.2 | The Constructive Power of Dissipation.....            | 18 |
| 4.3 | Whirlpools and Entropy Production.....                | 20 |
| 4.4 | Oscillations and Synchronization.....                 | 22 |
| 5.  | Discussion.....                                       | 24 |
| 5.1 | Why DCM?.....                                         | 24 |
| 5.2 | Is Contextuality Objective?.....                      | 25 |
| 5.3 | Cosmological Implications .....                       | 26 |
| 5.4 | Origin and Evolution of Life.....                     | 27 |
| 6.  | Summary and Conclusions .....                         | 28 |
|     | References .....                                      | 29 |
